# Supplementary material for: PrtT-Regulated Proteins Secreted by Aspergillus fumigatus Activate MAPK Signaling in Exposed A549 Lung Cells Leading to Necrotic Cell Death
Source: PLoS One. 2011 Mar 11;6(3):e17509. doi: 10.1371/journal.pone.0017509 (PMC3055868; doi:10.1371/journal.pone.0017509)
Supplement: Table S7 — Genes upregulated in response to wild-type CF relative to ΔPrtT CF. (XLS) [file pone.0017509.s007.xls]

## Sheet: Supp.Table 1G
Probe ID	Gene Name	EntrezID	TtestP-value	Fchange
8118310	HSPA1A	3303	2.573e-05	32.2581
8179322	HSPA1A	3303	2.845e-05	31.25
8179324	HSPA1B	3304	0.0004205	26.3158
8178086	HSPA1B	3304	0.0004205	26.3158
8118314	HSPA1B	3304	0.000267	25.641
8108301	KIF20A	10112	0.0003364	15.1515
7952335	SNORD14E	85391	0.001	13.8889
7919591		653573	0.003	11.6279
8008784	PRR11	55771	8.457e-05	9.80392
7979307	DLGAP5	9787	0.0002965	8.77193
7975779	FOS	2353	0.000162	8.47458
7983969	CCNB2	9133	0.000515	8.40336
7952339	SNORD14C	85389	0.002	8.06452
8168146	KIF4A	24137	0.001	7.93651
8149955	PBK	55872	0.002	7.87402
7937020	MKI67	4288	7.431e-05	7.87402
8067167	AURKA	6790	0.002	7.75194
8132318	ANLN	54443	0.001	7.75194
8109712	HMMR	3161	0.001	7.75194
7906764	HSPA6	3310	0.001	7.63359
8102643	CCNA2	890	0.0001756	7.24638
8039928	FAM72A	729533	0.0001119	6.99301
7909146	FAM72A	729533	8.483e-05	6.94444
8105828	CCNB1	891	0.0004207	6.84932
7904452	FAM72A	729533	8.898e-05	6.84932
8054580	BUB1	699	0.0005668	6.45161
7923189	KIF14	9928	0.004	6.0241
7929258	KIF11	3832	0.001	5.98802
8013671	SPAG5	10615	0.003	5.91716
7991406	PRC1	9055	0.000973	5.88235
7901010	KIF2C	11004	0.0004682	5.88235
8061579	TPX2	22974	0.0002868	5.84795
7906930	NUF2	83540	0.002	5.64972
7906775	HSPA6	3310	0.002	5.64972
7909708	CENPF	1063	0.0004563	5.58659
8109639	PTTG1	9232	0.0002013	5.58659
7916898	DEPDC1	55635	0.009	5.31915
8094278	NCAPG	64151	0.0007191	5.31915
7974404	CDKN3	1033	0.003	4.65116
8063043	UBE2C	11065	0.0002628	4.60829
8001133	SHCBP1	79801	0.0004998	4.56621
7929334	CEP55	55165	0.001	4.5045
7894877			0.005	4.36681
7927710	CDC2	983	0.008	4.34783
8014974	TOP2A	7153	0.0004714	4.31034
7960702	CDCA3	83461	0.0004696	4.31034
7947248	KIF18A	81930	0.003	4.20168
8140955	CDK6	1021	0.0007594	3.98406
7923086	ASPM	259266	0.002	3.95257
7982757	CASC5	57082	0.0006735	3.92157
8145418	CDCA2	157313	0.0008708	3.87597
7971866	DIAPH3	81624	0.002	3.81679
7982889	NUSAP1	51203	0.002	3.78788
8151101	MYBL1	4603	0.007	3.67647
8063536	TFAP2C	7022	0.0007507	3.64964
7950743	RAB30	27314	0.001	3.59712
7984540	KIF23	9493	0.001	3.58423
7957850	GAS2L3	283431	0.0008797	3.57143
8010260	BIRC5	332	0.002	3.5461
8130422	CNKSR3	154043	0.0004775	3.53357
7982358	ARHGAP11A	9824	0.001	3.4965
7896034			0.001	3.48432
8155214	MELK	9833	0.004	3.42466
8109484	KIF4A	24137	0.001	3.41297
7969243	CKAP2	26586	0.000815	3.31126
8062571	FAM83D	81610	0.0005293	3.30033
7955195	TROAP	10024	0.002	3.25733
8162870	BAAT	570	0.001	3.25733
8093500	TACC3	10460	0.0008745	3.25733
8168794	CENPI	2491	0.0009226	3.1746
8114425	CDC25C	995	0.001	3.14465
8152668	ATAD2	29028	0.001	3.125
8092726	CLDN1	9076	0.0006677	3.125
8179564	KIFC1	3833	0.0005053	3.11526
8095744	AREG	374	0.001	3.09598
8107706	LMNB1	4001	0.002	3.08642
7982663	BUB1B	701	0.004	3.06748
8154765	DNAJA1	3301	0.006	3.0581
7922846	FAM129A	116496	0.0005255	3.003
7942832	C11orf82	220042	0.007	2.98507
7960865	SLC2A3	6515	0.002	2.94985
8073858	GTSE1	51512	0.0007293	2.91545
7982712	C15orf23	90417	0.006	2.90698
7963157	RACGAP1	29127	0.0004766	2.90698
8043602	NCAPH	23397	0.0007799	2.89017
7893958			0.007	2.88184
7989647	KIAA0101	9768	0.004	2.88184
8162039	C9orf64	84267	0.001	2.88184
8122265	TNFAIP3	7128	0.002	2.87356
7915926	STIL	6491	0.005	2.84091
8089372	KIAA1524	57650	0.004	2.82486
7923426	UBE2T	29089	0.002	2.82486
8080926	ARL6IP5	10550	0.004	2.80112
7894782			0.001	2.80112
7949364	CDCA5	113130	0.001	2.76243
8118669	KIFC1	3833	0.0006272	2.76243
7958200	EID3	493861	0.005	2.71003
7940857	STIP1	10963	0.0008269	2.68817
8072242	NF2	4771	0.0007845	2.6738
8010978	LOC100130876	100130876	0.005	2.66667
8097335	HSPA4L	22824	0.007	2.65252
7913869	STMN1	3925	0.004	2.63852
8084100	USP13	8975	0.001	2.5974
8129497	EPB41L2	2037	0.003	2.57732
7985873	C15orf42	90381	0.002	2.57732
7981335	HSP90AA1	3320	0.002	2.57069
8098423	NEIL3	55247	0.001	2.54453
8016147	KIF18B	146909	0.003	2.53807
7919642	HIST2H2AB	317772	0.002	2.51889
7970864	HSPH1	10808	0.004	2.50627
7924603	LBR	3930	0.001	2.50627
8080938	MITF	4286	0.001	2.46914
8002266	CHTF8	54921	0.001	2.46305
7942596	SERPINH1	871	0.002	2.45098
8144153	NCAPG2	54892	0.005	2.43902
7895219			0.007	2.43309
8090555	H1FX	8971	0.005	2.41546
8023497	ATP8B1	5205	0.003	2.39234
8171892	NR0B1	190	0.003	2.39234
8116921	EDN1	1906	0.001	2.39234
8083941	ECT2	1894	0.008	2.36407
8108370	EGR1	1958	0.001	2.35849
8130567	TCP1	6950	0.001	2.34742
7953130	C12orf32	83695	0.001	2.26244
8040223	RRM2	6241	0.004	2.25734
7894174			0.002	2.25734
7919715	ANP32E	81611	0.006	2.25225
8000399	ZKSCAN2	342357	0.002	2.25225
8138067	CYTH3	9265	0.001	2.23214
8034772	ASF1B	55723	0.002	2.21239
7930921	BAG3	9531	0.001	2.21239
8028916	SNRPA	6626	0.001	2.21239
8112202	PLK2	10769	0.002	2.20751
7997940	SNORD68	606500	0.004	2.20264
7905088	HIST2H2AC	8338	0.003	2.20264
8001746	SNORA46	677827	0.008	2.18341
8117368	HIST1H4C	8364	0.001	2.1692
8073062	APOBEC3B	9582	0.006	2.15983
8026971	IFI30	10437	0.005	2.1322
7908409	RGS2	5997	0.002	2.11864
8014264	PEX12	5193	0.004	2.11416
8018849	TK1	7083	0.003	2.11416
8000409	HMGN2	3151	0.007	2.07469
7982204	HMGN2	3151	0.006	2.07469
7902227	GADD45A	1647	0.002	2.07469
8145570	ESCO2	157570	0.001	2.05761
8045860	PKP4	8502	0.003	2.05339
8100977	CXCL5	6374	0.001	2.04918
8072876	LGALS1	3956	0.001	2.03252
8066493	SLPI	6590	0.002	2.0284
7984330	ZWILCH	55055	0.004	2
7947694	CKAP5	9793	0.002	2
8117589	HIST1H3H	8357	0.006	1.99601
8018793	JMJD6	23210	0.003	1.99203
8043363	NCRNA00152	112597	0.002	1.98807
8009517	SOX9	6662	0.002	1.98413
7901549	CPT2	1376	0.005	1.9802
8103399	PDGFC	56034	0.002	1.9685
8167998	AR	367	0.003	1.96078
8007673	DBF4B	80174	0.002	1.96078
8056491	SCN9A	6335	0.005	1.95695
8047127	MYO1B	4430	0.005	1.95695
8165911	TBL1X	6907	0.006	1.94932
8054611	NCRNA00152	112597	0.003	1.94553
7960553	MRPL51	51258	0.002	1.93798
8123609	SERPINB9	5272	0.005	1.92308
8065071	FLRT3	23767	0.006	1.91571
7965855	NUP37	79023	0.008	1.9084
7895123			0.006	1.9084
8034084	AP1M2	10053	0.005	1.90476
7950128	C11orf51	25906	0.002	1.90476
7954899	CNTN1	1272	0.008	1.90114
8131614	AHR	196	0.003	1.89753
7940600	INCENP	3619	0.003	1.88679
7945740	RPL26L1	51121	0.004	1.88324
7965335	DUSP6	1848	0.003	1.88324
8105436	MAP3K1	4214	0.004	1.87617
8089801	GSK3B	2932	0.002	1.87617
8126259	C6orf130	221443	0.007	1.87266
8057744	STAT1	6772	0.003	1.87266
8062766	MYBL2	4605	0.002	1.87266
7941709	RBM4	5936	0.002	1.86916
8101437	COQ2	27235	0.002	1.86567
8058695	BARD1	580	0.006	1.8622
8020955	MOCOS	55034	0.002	1.85874
7995354	ORC6L	23594	0.005	1.85185
8016994	RNF43	54894	0.005	1.84502
8143279	ZC3HAV1	56829	0.004	1.84162
8005638	ALDH3A2	224	0.003	1.84162
7896714			0.003	1.83824
7894986			0.005	1.8315
7938422	CTR9	9646	0.002	1.82815
7963534	KRT4	3851	0.008	1.82149
7923967	YOD1	55432	0.005	1.81488
7961983	TM7SF3	51768	0.004	1.80832
7925480	FH	2271	0.007	1.8018
8092707	LEPREL1	55214	0.004	1.79533
7895952			0.009	1.79211
8019842	TYMS	7298	0.007	1.79211
8092177	NCEH1	57552	0.006	1.79211
8059801	USP40	55230	0.006	1.78253
7908147	TSEN15	116461	0.005	1.7762
7957242	LOC552889	552889	0.003	1.76991
8013089			0.004	1.76678
8013771	TLCD1	116238	0.007	1.76367
7983650	SLC27A2	11001	0.004	1.76367
8166335	PDHA1	5160	0.004	1.76056
8150599	PRKDC	5591	0.003	1.75747
7914216	SNORA16A	692073	0.003	1.74825
7990211	HEXA	3073	0.007	1.74216
7894409			0.007	1.7331
8032455	PLEKHJ1	55111	0.005	1.7301
8124196	DCDC2	51473	0.003	1.7301
7894926			0.003	1.72712
8061471	GINS1	9837	0.003	1.72712
8065433	C20orf3	57136	0.008	1.72117
7892568			0.004	1.71821
7956759	SRGAP1	57522	0.005	1.71233
7895890			0.004	1.71233
8138888	PDE1C	5137	0.003	1.70648
7914791	SFPQ	6421	0.004	1.70358
7909789	TGFB2	7042	0.003	1.70358
7894754			0.008	1.69779
8095907	FRAS1	80144	0.006	1.68634
8142687	GPR37	2861	0.006	1.68634
7956159	RPL41	6171	0.005	1.68067
7934185	C10orf54	64115	0.007	1.67785
8037283	PSG4	5672	0.006	1.67504
7947189	CCDC34	91057	0.007	1.65837
8018305	HN1	51155	0.005	1.65837
7925492	OPN3	23596	0.006	1.65563
8073775	FBLN1	2192	0.007	1.64745
7896651			0.004	1.64204
7959205	MLEC	9761	0.006	1.63934
8180403			0.007	1.63666
8162601	ZNF367	195828	0.006	1.63132
7895297			0.007	1.62866
8102848	SETD7	80854	0.005	1.62602
8171435	PIR	8544	0.006	1.61812
7898736	HSPC157	29092	0.008	1.61031
7895665			0.005	1.61031
7894919			0.005	1.60256
7927631	DKK1	22943	0.008	1.6
7959023	MAP1LC3B2	643246	0.006	1.59236
7911335			0.005	1.59236
8165694			0.005	1.59236
8115524	CLINT1	9685	0.006	1.58479
7940561	FEN1	2237	0.006	1.58228
8006668	MRM1	79922	0.008	1.57729
7981142	CLMN	79789	0.007	1.56986
7909890	HLX	3142	0.008	1.56495
7932227	NMT2	9397	0.006	1.56495
7922418	SNORD74	619498	0.007	1.5625
8099259	AFAP1	60312	0.006	1.5528
7917347	DDAH1	23576	0.006	1.5456
8002897	TMEM231	79583	0.008	1.54321
7904726	TXNIP	10628	0.008	1.52905
8101324	HNRNPD	3184	0.008	1.52672
8052703	WDR92	116143	0.008	1.51286
